# Supplementary material for: Catalyst-free room-temperature iClick reaction of molybdenum(ii) and tungsten(ii) azide complexes with electron-poor alkynes: structural preferences and kinetic studies
Source: Royal Society of Chemistry journal article supplement (doi:10.1039/c7dt03096g), 2017-01-01
Supplement: c7dt03096g1.pdf [file c7dt03096g1.pdf]

**Catalyst-free room-temperature iClick reaction  
of molybdenum(II) and tungsten(II) azide complexes  
with electron-poor alkynes: Structural preferences and  
kinetic studies**

**Paul Schmid,<sup>a</sup> Matthias Maier,<sup>a</sup> Hendrik Pfeiffer,<sup>a</sup> Anja Belz,<sup>a</sup> Lucas Henry,<sup>a</sup>  
Alexandra Friedrich,<sup>a</sup> Fabian Schönfeld,<sup>a</sup> Katharina Edkins<sup>a,b</sup> and Ulrich Schatzschneider<sup>\*a</sup>**

<sup>a</sup>Institut für Anorganische Chemie,  
Julius-Maximilians-Universität Würzburg, Am Hubland, D-97074 Würzburg, Germany  
Fax: +49 931 3184605  
eMail: [ulrich.schatzschneider@uni-wuerzburg.de](mailto:ulrich.schatzschneider@uni-wuerzburg.de)

<sup>b</sup>School of Pharmacy, Queen's University Belfast, 97 Lisburn Road, BT9 7BL,  
United Kingdom

**Supporting Information**

## Synthesis of ligands and precursors

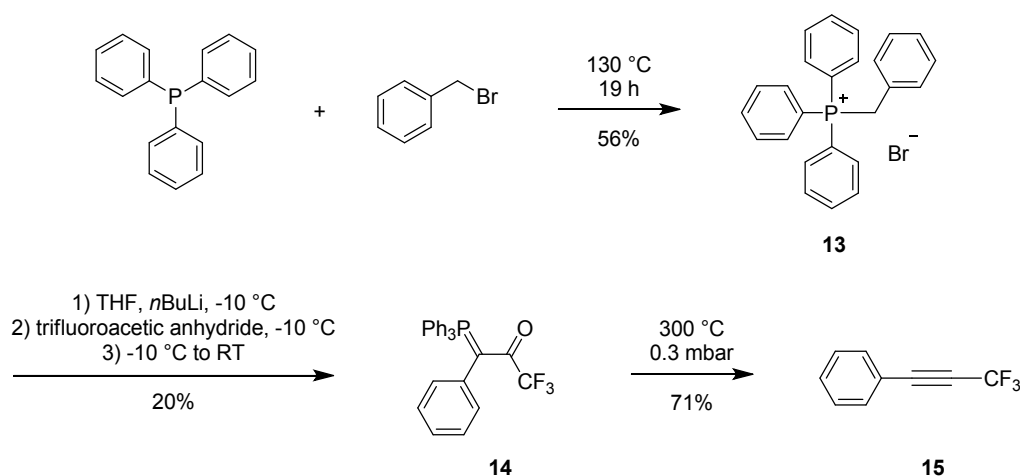

**Scheme S1.** Three-step synthesis of phenyltrifluoromethylacetylene **15** from benzylbromide and triphenylphosphine (Y. Kobayashi, T. Yamashita, K. Takahashi, H. Kuroda and I. Kumadaki, *Chem. Pharm. Bull.* **1984**, 32, 4402).

**Synthesis of benzyltriphenylphosphonium bromide (13).** Solid triphenylphosphine (15.3 g, 58.5 mmol) was mixed under argon with benzyl bromide (7.6 mL, 11.0 g, 64.3 mmol) and heated to 130 °C for 19 h. The yellow crude product was then purified by column chromatography on silica using dichloromethane/methanol (9:1 v/v) as the eluent to obtain a colorless solid. Yield: 56% (14.2 g, 32.8 mmol). Elemental analysis (%): calc. C<sub>25</sub>H<sub>22</sub>BrP: C 69.30, H 5.12, found: C 69.19, H 5.10; IR (ATR, cm<sup>-1</sup>): 3055 (m), 2982 (m), 2773 (m), 1438 (s), 1111 (s); <sup>1</sup>H NMR (CDCl<sub>3</sub>, 500.13 MHz, ppm): δ 7.65–7.77 (m, 9H, C<sub>6</sub>H<sub>5</sub>), 7.56–7.63 (m, 6H, C<sub>6</sub>H<sub>5</sub>), 7.16–7.21 (m, 1H, C<sub>6</sub>H<sub>5</sub>), 7.04–7.10 (m, 4H, C<sub>6</sub>H<sub>5</sub>), 5.33 (d, 2H, <sup>2</sup>J<sub>H,P</sub> = 14.4 Hz, CH<sub>2</sub>); <sup>13</sup>C NMR (CDCl<sub>3</sub>, 125.76 MHz, ppm): δ 135.08 (phenyl-C), 133.44 (phenyl-C), 131.57 (phenyl-C), 130.23 (phenyl-C), 128.89 (phenyl-C), 128.47 (phenyl-C), 127.18 (phenyl-C), 117.82 (phenyl-C), 30.92 (CH<sub>2</sub>); <sup>31</sup>P{<sup>1</sup>H} NMR (CDCl<sub>3</sub>, 202.46 MHz, ppm): δ 23.15 (s).

**Synthesis of triphenylphosphonium- $\alpha$ -(trifluoroacetyl)benzylide (14).** Benzyltriphenylphosphonium bromide (**13**, 500 mg, 1.15 mmol) was dissolved under argon in anhydrous tetrahydrofuran (10 mL) and the white suspension cooled to  $-10\text{ }^{\circ}\text{C}$  using a mixture of ice and sodium chloride. Then, over a period of 45 min, 1.6 M *n*-butyllithium in *n*-hexane (1.44 mL, 148 mg, 2.31 mmol) was added, followed by stirring at  $-10\text{ }^{\circ}\text{C}$  for 1 h. Afterwards, trifluoroacetic anhydride (162  $\mu\text{L}$ , 242 mg, 1.15 mmol) was added dropwise over a period of 10 min at  $-10\text{ }^{\circ}\text{C}$  and the mixture then stirred for 1 h at room temperature. After addition of isopropanol (3 mL), the solvent was removed under reduced pressure. The crude brown product was purified by column chromatography on silica using dichloromethane/methanol (49:1 v/v) as the eluent. The resulting yellow material was washed with diethyl ether (10 mL) to obtain a colorless solid. Yield: 20% (101 mg, 0.23 mmol). Elemental analysis (%): calc.  $\text{C}_{27}\text{H}_{20}\text{F}_3\text{OP}$ : C 72.32, H 4.50, found: 72.44, H 4.60; IR (ATR,  $\text{cm}^{-1}$ ): 3056 (w), 1553 (s), 1159 (s), 1104 (s);  $^1\text{H}$  NMR ( $\text{CDCl}_3$ , 500.13 MHz, ppm):  $\delta$  7.56–7.49 (m, 9H,  $\text{PC}_6\text{H}_5$ ), 7.43–7.37 (m, 6H,  $\text{PC}_6\text{H}_5$ ), 7.05–6.97 (m, 5H,  $\text{CC}_6\text{H}_5$ );  $^{13}\text{C}$  NMR ( $\text{CDCl}_3$ , 125.76 MHz, ppm):  $\delta$  170.39 (dq,  $^2J_{\text{C,F}} = 30.1\text{ Hz}$ ,  $^2J_{\text{C,P}} = 8.6\text{ Hz}$ , C=O), 135.13 (d,  $^3J_{\text{C,P}} = 4.7\text{ Hz}$ , phenyl-C), 134.14 (d,  $^2J_{\text{C,P}} = 8.1\text{ Hz}$ , phenyl-C), 133.77 (d,  $^3J_{\text{C,P}} = 9.7\text{ Hz}$ , phenyl-C), 132.38 (d,  $^4J_{\text{C,P}} = 2.4\text{ Hz}$ , phenyl-C), 128.91 (d,  $^2J_{\text{C,P}} = 12.4\text{ Hz}$ , phenyl-C), 127.55 (d,  $^4J_{\text{C,P}} = 2.4\text{ Hz}$ , phenyl-C), 126.54 (d,  $^5J_{\text{C,P}} = 3.0\text{ Hz}$ , phenyl-C), 124.59 (d,  $^1J_{\text{C,P}} = 90.8\text{ Hz}$ , C-P), 119.41 (dq,  $^1J_{\text{C,F}} = 291.0\text{ Hz}$ ,  $^3J_{\text{C,P}} = 20.1\text{ Hz}$ ,  $\text{CF}_3$ ), signal for C=P carbon atom observed;  $^{31}\text{P}\{^1\text{H}\}$  NMR ( $\text{CDCl}_3$ , 202.46 MHz, ppm):  $\delta$  19.70 (s,  $\text{PPh}_3$ );  $^{19}\text{F}$  NMR ( $\text{CDCl}_3$ , 470.59 MHz, ppm):  $\delta$  -68.36 (d,  $^4J_{\text{F,P}} = 2.6\text{ Hz}$ ,  $\text{CF}_3$ ).

**Synthesis of phenyltrifluoromethylacetylene (15).** A one-neck round-bottom flask filled with triphenylphosphonium- $\alpha$ -(trifluoroacetyl)benzylide (**14**, 2.75 g, 6.14 mmol) was connected *via* a long glass tube to a Schlenk flask immersed in liquid dinitrogen, which was heated to  $300\text{ }^{\circ}\text{C}$  under vacuum ( $3 \cdot 10^{-1}$  mbar) for 2 h with a heat gun. The collection flask was allowed to reach room temperature and the product collected as a clear colorless liquid. Yield: 71% (740 mg, 4.35 mmol). Elemental analysis (%): calc.  $\text{C}_9\text{H}_5\text{F}_3$ : C 63.54, H 2.96, found: C 63.39, H 2.97; IR (ATR,  $\text{cm}^{-1}$ ): 2254 (s), 1493 (m), 1309 (vs), 1124 (vs);  $^1\text{H}$  NMR ( $\text{CDCl}_3$ , 400.40 MHz, ppm):  $\delta$  7.60–7.54 (m, 2H,  $\text{C}_6\text{H}_5$ ), 7.51–7.45 (m, 1H,  $\text{C}_6\text{H}_5$ ), 7.44–7.37 (m, 2H,  $\text{C}_6\text{H}_5$ );  $^{13}\text{C}$  NMR ( $\text{CDCl}_3$ , 100.68 MHz, ppm):  $\delta$  132.59 (q,  $^5J_{\text{C,F}} = 1.6\text{ Hz}$ , phenyl-C), 131.02 (s, phenyl-C), 128.80 (s, phenyl-C), 118.68 (q,  $^4J_{\text{C,F}} = 1.8\text{ Hz}$ ,  $\text{C}\equiv\text{C}-\text{CF}_3$ ), 115.00 (q,  $^1J_{\text{C,F}} = 257.0\text{ Hz}$ ,  $\text{CF}_3$ ), 86.67 (q,  $^3J_{\text{C,F}} = 6.5\text{ Hz}$ , phenyl-C), 75.85 (q,  $^2J_{\text{C,F}} = 52.5\text{ Hz}$ ,  $\text{C}\equiv\text{C}-\text{CF}_3$ );  $^{19}\text{F}$  NMR ( $\text{CDCl}_3$ , 376.75 MHz, ppm):  $\delta$  -49.80 (s,  $\text{CF}_3$ ).

**Synthesis of [W(bpy)(CO)<sub>4</sub>] (7).** Tungsten hexacarbonyl (1.00 g, 2.84 mmol) was suspended under argon in degassed benzene (25 mL). Then, under efficient stirring, a solution of trimethylamine-*N*-oxide dihydrate (TMAO, 679 mg, 6.11 mmol) in degassed methanol (10 mL) was added, which resulted in the solution to turn yellow immediately. Then, solid 2,2'-bipyridine (470 mg, 3.01 mmol) was added, upon which the solution turned red over the course of 1 h. Stirring was continued at room temperature for 2 d. The resulting red-brown solid which had precipitated was filtered off and recrystallized from acetonitrile (100 mL). Finally, the product was washed with *n*-hexane (50 mL) and dried under vacuum overnight, resulting in a dark violet crystalline solid. Yield: 31% (399 mg, 0.88 mmol). Elemental analysis (%): calc. C<sub>14</sub>H<sub>8</sub>N<sub>2</sub>O<sub>4</sub>W: C 37.20, H 1.78, N 6.20, found: C 37.16, H 1.96, N 6.17; IR (ATR, cm<sup>-1</sup>): 2001 (m), 1902 (m), 1821 (s), 1787 (s), 1599 (s), 1467 (s), 1437 (m), 759 (m); <sup>1</sup>H NMR (DMSO-*d*<sub>6</sub>, 500.13 MHz, ppm): δ 9.09 (ddd, 2H, <sup>3</sup>J<sub>H6,H5</sub> = 5.5 Hz, <sup>4</sup>J<sub>H6,H4</sub> = 1.6 Hz, <sup>5</sup>J<sub>H6,H3</sub> = 0.8 Hz, bpy-H6), 8.71 (dt, 2H, <sup>3</sup>J<sub>H3,H4</sub> = 8.3 Hz, <sup>4</sup>J<sub>H3,H5</sub> = 1.0 Hz, bpy-H3), 8.24 (ddd, 2H, <sup>3</sup>J<sub>H4,H3</sub> = 8.1 Hz, <sup>3</sup>J<sub>H4,H5</sub> = 7.6 Hz, <sup>4</sup>J<sub>H4,H6</sub> = 1.6 Hz, bpy-H4), 7.67 (ddd, 2H, <sup>3</sup>J<sub>H5,H4</sub> = 7.5 Hz, <sup>3</sup>J<sub>H5,H6</sub> = 5.5 Hz, <sup>4</sup>J<sub>H5,H3</sub> = 1.3 Hz, bpy-H5); <sup>13</sup>C NMR (DMSO-*d*<sub>6</sub>, 125.76 MHz, ppm): δ 214.80 (C≡O), 201.64 (C≡O), 155.22 (bpy-C2), 152.41 (bpy-C6), 138.84 (bpy-C4), 127.04 (bpy-C5), 124.05 (bpy-C3).

**Synthesis of [W(bpy)(CO)<sub>3</sub>(py)] (8).** Pyridine (1 mL, 0.98 g, 12.4 mmol) was dissolved in degassed xylene (10 mL), solid [W(bpy)(CO)<sub>4</sub>] (7, 250 mg, 0.55 mmol) added, and the reaction mixture heated to reflux for 18 h. The resulting black precipitate was filtered from the yellow-red solution, washed with toluene (50 mL) and methanol (20 mL) and dried under vacuum overnight. Yield: 76% (213 mg, 0.42 mmol). Elemental analysis (%): calc. C<sub>18</sub>H<sub>13</sub>N<sub>3</sub>O<sub>3</sub>W: C 42.97, H 2.60, N 8.35, found: C 40.37, H 2.70, N 7.40; IR (ATR, cm<sup>-1</sup>): 1874 (s) 1745 (s), 1600 (w), 1466 (w), 1440 (m), 763 (m); since the pyridine ligand rapidly exchanged with solvent, for example in DMSO, no NMR assignment was made.

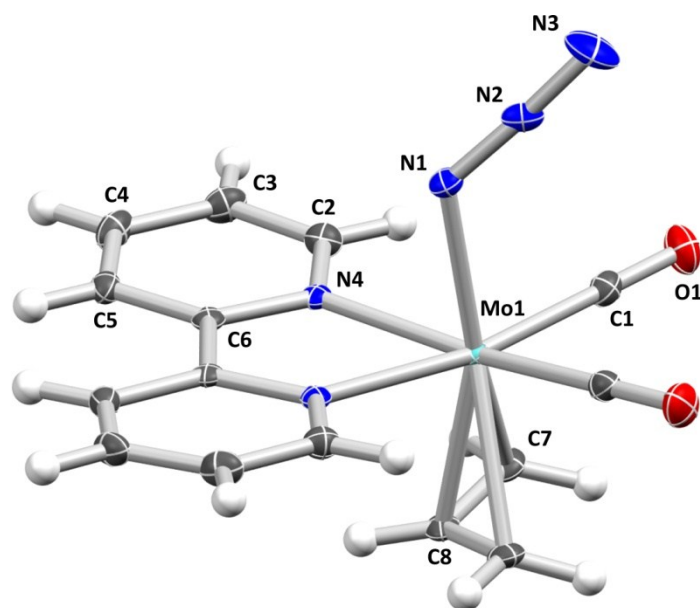

**Fig. S1** Molecular structure of  $[\text{Mo}(\eta^3\text{-allyl})(\text{N}_3)(\text{bpy})(\text{CO})_2]$  (**2**) with thermal ellipsoids displayed at the 50% probability level. The asymmetric unit contains only one half of the molecule with the other one related to it by a mirror plane. Selected bond lengths [ $\text{\AA}$ ] and angles [ $^\circ$ ] for **2**: Mo1–C1 1.956(2), Mo1–N1 2.180(3), Mo1–N4 2.240(2), Mo1–(allyl centroid) 2.044(2), C1–O1 1.163(3), C7–C8 1.409(3), N1–N2 1.201(4), N2–N3 1.152(4), C1–Mo1–C1a 81.4(1), N4–Mo1–N4a 72.3(1), C1–Mo1–N4 102.53(9), N1–Mo1–(allyl centroid) 174.24(9), C7–C8–C7a 114.8(3), Mo1–N1–N2 124.9(2), N1–N2–N3 176.7(4).

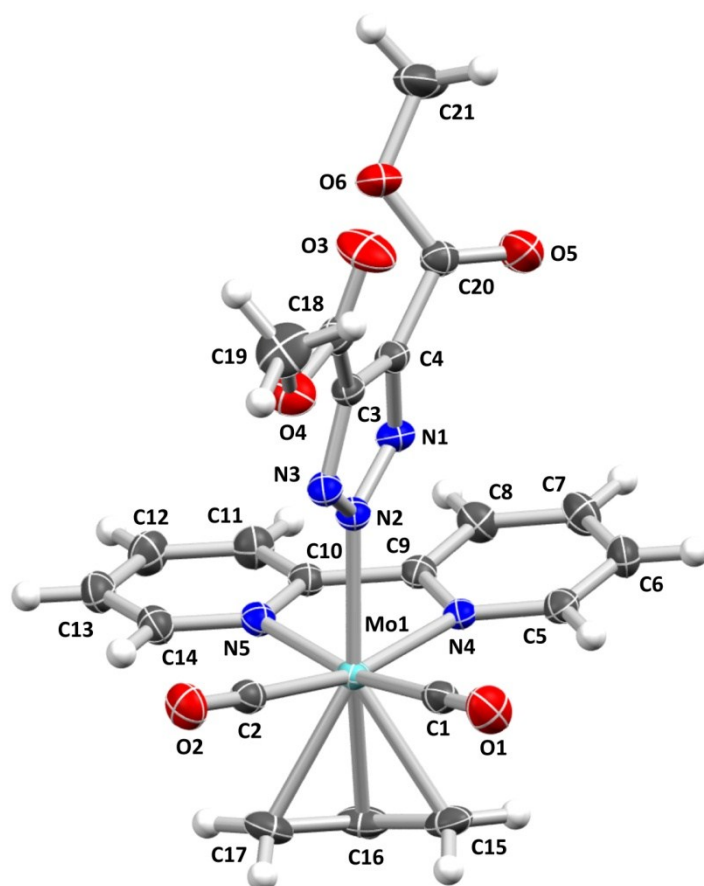

**Fig. S2** Molecular structure of  $[\text{Mo}(\eta^3\text{-allyl})(\text{triazolate}^{\text{COOCH}_3, \text{COOCH}_3})(\text{bpy})(\text{CO})_2]$  (**5**) with thermal ellipsoids displayed at the 50% probability level. Selected bond lengths [ $\text{\AA}$ ] and angles [ $^\circ$ ] for **5**: Mo1–C1 1.978(2), Mo1–C2 1.969(2), Mo1–N2 2.221(2), Mo1–N4 2.255(2), Mo1–N5 2.258(2), Mo1–(allyl centroid) 2.056(2), C1–O1 1.156(3), C2–O2 1.160(3), C15–C16 1.408(4), C16–C17 1.411(3), C1–Mo1–C2 80.47(9), N4–Mo1–N5 72.77(7), C1–Mo1–N4 104.38(8), C2–Mo1–N5 100.25(8), N2–Mo1–(allyl centroid) 177.63(6), C15–C16–C17 116.1(2), (N2–Mo1–C16)–(triazolate) 13.6(3).

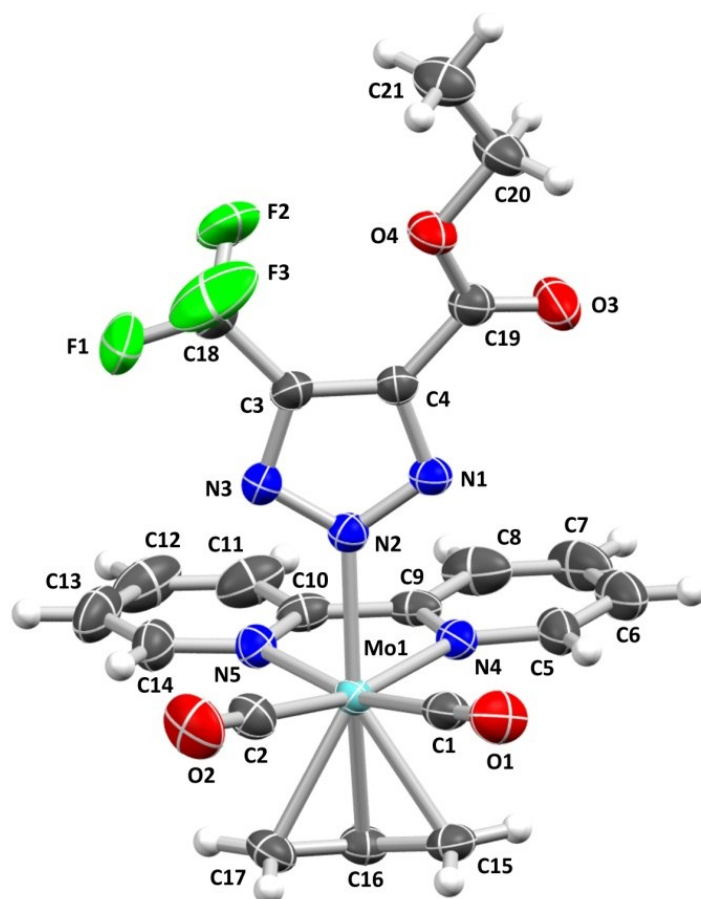

**Fig. S3** Molecular structure of  $[\text{Mo}(\eta^3\text{-allyl})(\text{triazolate}^{\text{CF}_3, \text{COOEt}})(\text{bpy})(\text{CO})_2]$  (**6**) with thermal ellipsoids displayed at the 50% probability level. Selected bond lengths [ $\text{\AA}$ ] and angles [ $^\circ$ ] for **6**: Mo1–C1 1.954(3), Mo1–C2 1.964(2), Mo1–N2 2.210(2), Mo1–N4 2.218(2), Mo1–N5 2.234(2), Mo1–(allyl centroid) 2.048(2), C1–O1 1.156(3), C2–O2 1.150(3), C15–C16 1.400(4), C16–C17 1.396(4), C1–Mo1–C2 81.4(1), N4–Mo1–N5 73.11(8), C1–Mo1–N4 101.8(1), C2–Mo1–N5 101.4(1), N2–Mo1–(allyl centroid) 176.37(7), C15–C16–C17 116.4(3), (N2–Mo1–C16)–(triazolate) 80.4(3).

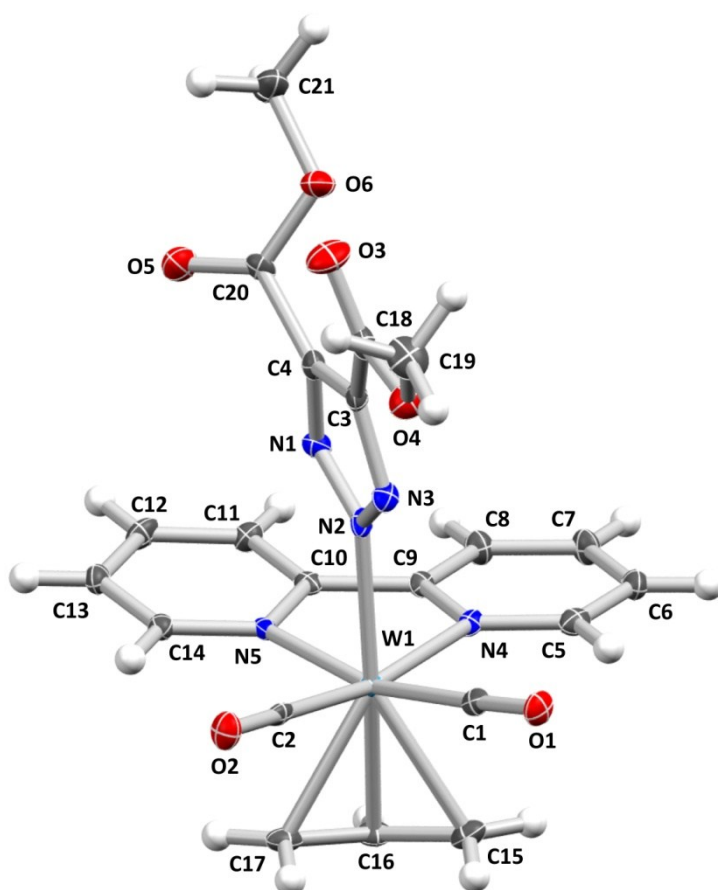

**Fig. S4** Molecular structure of  $[W(\eta^3\text{-allyl})(\text{triazolate}^{\text{COOCH}_3, \text{COOCH}_3})(\text{bpy})(\text{CO})_2]$  (**11**) with thermal ellipsoids displayed at the 50% probability level. Selected bond lengths [ $\text{\AA}$ ] and angles [ $^\circ$ ] for **11**: W1–C1 1.957(4), W1–C2 1.960(4), W1–N2 2.194(3), W1–N4 2.224(3), W1–N5 2.231(3), W1–(allyl centroid) 2.032(2), C1–O1 1.163(4), C2–O2 1.165(5), C15–C16 1.402(6), C16–C17 1.404(6), C1–W1–C2 80.9(2), N4–W1–N5 73.1(1), C1–W1–N4 99.7(1), C2–W1–N5 104.1(1), N2–W1–(allyl centroid) 177.6(1), C15–C16–C17 115.8(3), (N2–W1–C16)–(triazolate) 15.6(5).



**Table S1** Crystallographic parameters for **2**, **5**, and **6** as well as **10–12**

| Compound                                                       | <b>2</b>                                                        | <b>5</b>                                                        | <b>6</b>                                                                       | <b>10</b>                                                       | <b>11</b>                                                       | <b>12</b>                                                                      |
|----------------------------------------------------------------|-----------------------------------------------------------------|-----------------------------------------------------------------|--------------------------------------------------------------------------------|-----------------------------------------------------------------|-----------------------------------------------------------------|--------------------------------------------------------------------------------|
| Empirical formula                                              | C <sub>15</sub> H <sub>13</sub> MoN <sub>5</sub> O <sub>2</sub> | C <sub>21</sub> H <sub>19</sub> MoN <sub>5</sub> O <sub>6</sub> | C <sub>21</sub> H <sub>18</sub> F <sub>3</sub> MoN <sub>5</sub> O <sub>4</sub> | C <sub>15</sub> H <sub>13</sub> N <sub>5</sub> O <sub>2</sub> W | C <sub>21</sub> H <sub>19</sub> N <sub>5</sub> O <sub>6</sub> W | C <sub>21</sub> H <sub>18</sub> F <sub>3</sub> N <sub>5</sub> O <sub>4</sub> W |
| Formula weight (g·mol <sup>-1</sup> )                          | 391.24                                                          | 533.35                                                          | 557.34                                                                         | 479.15                                                          | 621.26                                                          | 645.25                                                                         |
| Temperature (K)                                                | 100(2)                                                          | 173(2)                                                          | 273(2)                                                                         | 100(2)                                                          | 100(2)                                                          | 100(2)                                                                         |
| Radiation, λ (Å)                                               | MoK <sub>α</sub> 0.71073                                        | MoK <sub>α</sub> 0.71073                                        | MoK <sub>α</sub> 0.71073                                                       | MoK <sub>α</sub> 0.71073                                        | MoK <sub>α</sub> 0.71073                                        | MoK <sub>α</sub> 0.71073                                                       |
| Crystal system                                                 | Orthorhombic                                                    | Monoclinic                                                      | Triclinic                                                                      | Orthorhombic                                                    | Monoclinic                                                      | Monoclinic                                                                     |
| Space group                                                    | <i>Pnma</i>                                                     | <i>P2<sub>1</sub>/c</i>                                         | <i>p</i> $\bar{1}$                                                             | <i>Pnma</i>                                                     | <i>P2<sub>1</sub>/c</i>                                         | <i>P2<sub>1</sub>/c</i>                                                        |
| <i>Unit cell dimensions</i>                                    |                                                                 |                                                                 |                                                                                |                                                                 |                                                                 |                                                                                |
| <i>a</i> (Å)                                                   | 16.96(1)                                                        | 11.815(8)                                                       | 10.545(2)                                                                      | 16.83(3)                                                        | 11.697(6)                                                       | 11.078(5)                                                                      |
| <i>b</i> (Å)                                                   | 13.755(6)                                                       | 9.369(6)                                                        | 10.851(2)                                                                      | 13.77(2)                                                        | 9.262(6)                                                        | 9.984(5)                                                                       |
| <i>c</i> (Å)                                                   | 6.589(3)                                                        | 20.13(1)                                                        | 11.320(2)                                                                      | 6.602(8)                                                        | 19.89(1)                                                        | 19.17(1)                                                                       |
| $\alpha$ (°)                                                   | 90                                                              | 90                                                              | 82.745(7)                                                                      | 90                                                              | 90                                                              | 90                                                                             |
| $\beta$ (°)                                                    | 90                                                              | 103.28(1)                                                       | 63.061(8)                                                                      | 90                                                              | 103.39(2)                                                       | 91.10(2)                                                                       |
| $\gamma$ (°)                                                   | 90                                                              | 90                                                              | 75.89(2)                                                                       | 90                                                              | 90                                                              | 90                                                                             |
| Volume (Å <sup>3</sup> )                                       | 1537(1)                                                         | 2169(3)                                                         | 1119.7(4)                                                                      | 1530(4)                                                         | 2096(2)                                                         | 2120(2)                                                                        |
| <i>Z</i>                                                       | 4                                                               | 4                                                               | 2                                                                              | 4                                                               | 4                                                               | 4                                                                              |
| Calculated density (kg·m <sup>-3</sup> )                       | 1.690                                                           | 1.633                                                           | 1.653                                                                          | 2.080                                                           | 1.969                                                           | 2.022                                                                          |
| Absorption coefficient (mm <sup>-1</sup> )                     | 0.870                                                           | 0.654                                                           | 0.649                                                                          | 7.566                                                           | 5.563                                                           | 5.517                                                                          |
| <i>F</i> (000)                                                 | 784                                                             | 1080                                                            | 560                                                                            | 912                                                             | 1208                                                            | 1248                                                                           |
| Theta range for collection (2 $\theta$ , °)                    | 2.822 to 26.019                                                 | 1.771 to 26.019                                                 | 2.216 to 26.843                                                                | 2.837 to 28.279                                                 | 2.438 to 26.022                                                 | 1.839 to 26.022                                                                |
| Reflections collected                                          | 9005                                                            | 17803                                                           | 15715                                                                          | 9425                                                            | 15002                                                           | 24833                                                                          |
| Independent reflections                                        | 1577                                                            | 4262                                                            | 4788                                                                           | 1979                                                            | 4133                                                            | 4178                                                                           |
| Minimum/maximum transmission                                   | 0.6445 / 0.7465                                                 | 0.5979 / 0.7453                                                 | 0.8842 / 0.9763                                                                | 0.5011 / 0.7471                                                 | 0.4438 / 0.7465                                                 | 0.5169 / 0.7471                                                                |
| Refinement method                                              | a                                                               | a                                                               | a                                                                              | a                                                               | a                                                               | a                                                                              |
| Data / parameters / restraints                                 | 1577 / 120 / 0                                                  | 4262 / 300 / 0                                                  | 4788 / 325 / 5                                                                 | 1979 / 120 / 0                                                  | 4133 / 315 / 5                                                  | 4178 / 323 / 5                                                                 |
| Goodness-of-fit on <i>F</i> <sup>2</sup>                       | 1.035                                                           | 1.060                                                           | 1.034                                                                          | 1.020                                                           | 1.026                                                           | 1.049                                                                          |
| Final <i>R</i> indices [ <i>I</i> > 2 $\sigma$ ( <i>I</i> )]   | R <sub>1</sub> = 0.0237<br>wR <sub>2</sub> = 0.0555             | R <sub>1</sub> = 0.0260<br>wR <sub>2</sub> = 0.0656             | R <sub>1</sub> = 0.0330<br>wR <sub>2</sub> = 0.0634                            | R <sub>1</sub> = 0.0220<br>wR <sub>2</sub> = 0.0452             | R <sub>1</sub> = 0.0227<br>wR <sub>2</sub> = 0.0487             | R <sub>1</sub> = 0.0155<br>wR <sub>2</sub> = 0.0345                            |
| <i>R</i> indices (all data)                                    | R <sub>1</sub> = 0.0332<br>wR <sub>2</sub> = 0.0596             | R <sub>1</sub> = 0.0292<br>wR <sub>2</sub> = 0.0676             | R <sub>1</sub> = 0.0476<br>wR <sub>2</sub> = 0.0679                            | R <sub>1</sub> = 0.0352<br>wR <sub>2</sub> = 0.0501             | R <sub>1</sub> = 0.0299<br>wR <sub>2</sub> = 0.0511             | R <sub>1</sub> = 0.0172<br>wR <sub>2</sub> = 0.0351                            |
| Maximum/minimum residual electron density (e·Å <sup>-3</sup> ) | 0.512 / -0.461                                                  | 0.330 / -0.292                                                  | 0.368 / -0.407                                                                 | 1.380 / -0.764                                                  | 0.787 / -0.889                                                  | 0.873 / -0.626                                                                 |

<sup>a</sup> Full-matrix least-squares on *F*<sup>2</sup>.

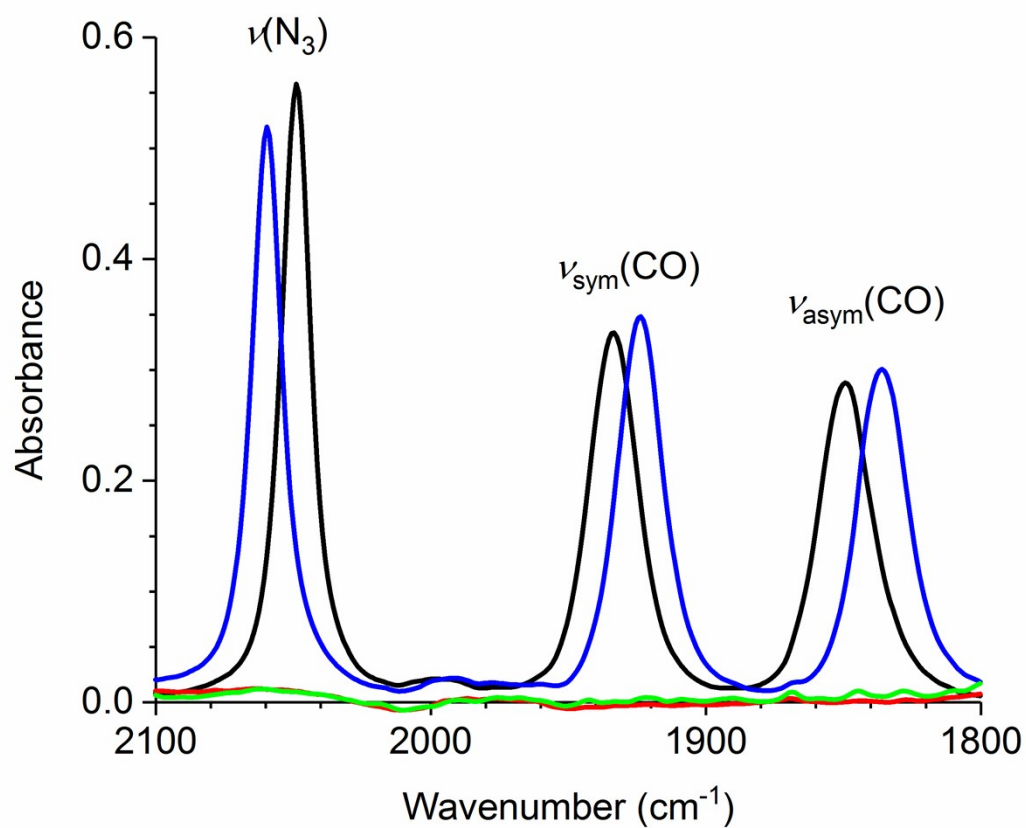

**Fig. S5** Solution IR spectra of azide complexes **2** (black, 8 mM) and **10** (blue, 8 mM) as well as alkynes **3** (red, 40 mM) and **4** (green, 40 mM) in dimethylsulfoxide.

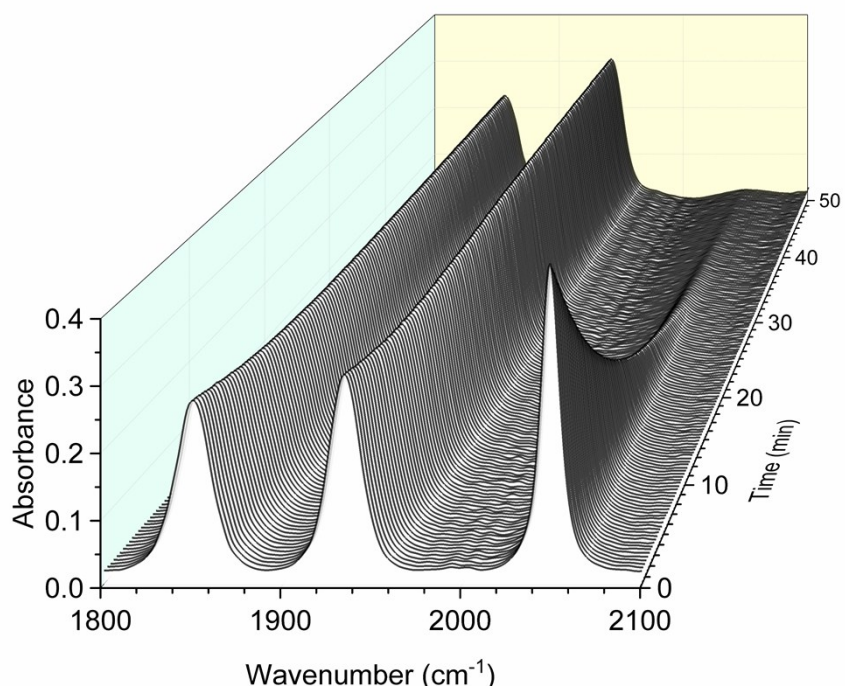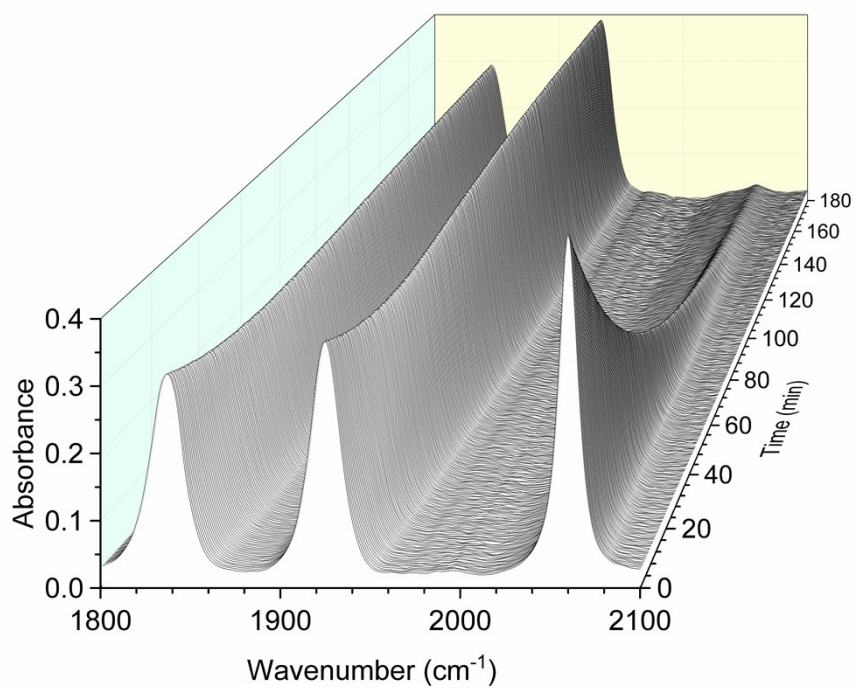

**Fig. S6** Changes in the 1800–2100  $\text{cm}^{-1}$  spectral range of the IR spectrum of a mixture of **2** (top) or **10** (bottom) in dimethylsulfoxide (8 mM) upon reaction with dimethyl acetylenedicarboxylate (DMAD, **3**, 40 mM) at 26 °C in 20 s intervals for up to 180 min.

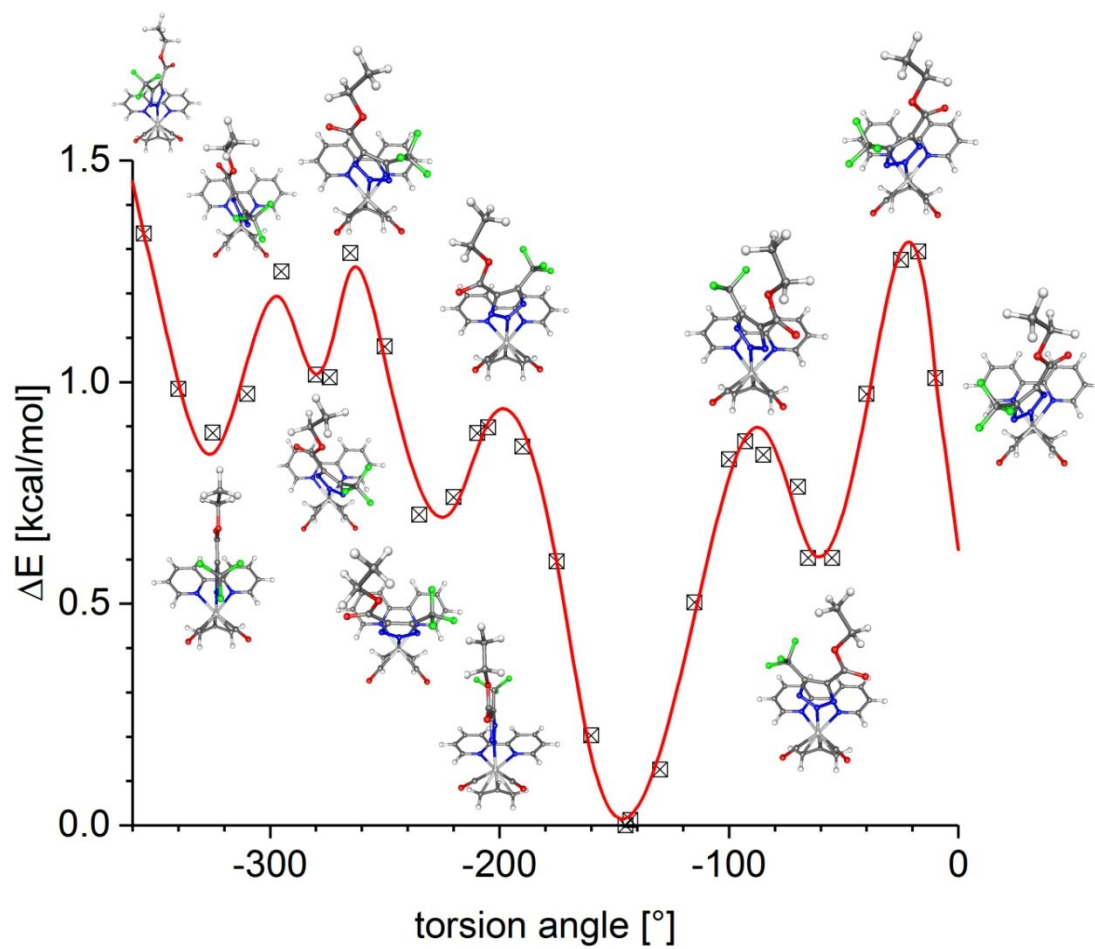

**Fig. S7** Conformational energy diagram of **6** for variation of the torsion angle between the triazolite mean plane and the bpy C2–C2' axis calculated with DFT (ORCA 2.8, BP86, RI, TZVP, COSMO in DMSO).
